# Supplementary figures and images for: A dual electro-optical biosensor based on Chlamydomonas reinhardtii immobilised on paper-based nanomodified screen-printed electrodes for herbicide monitoring
Source: Research Square preprint supplement (doi:10.21203/rs.3.rs-369389/v1), 2021-03-31

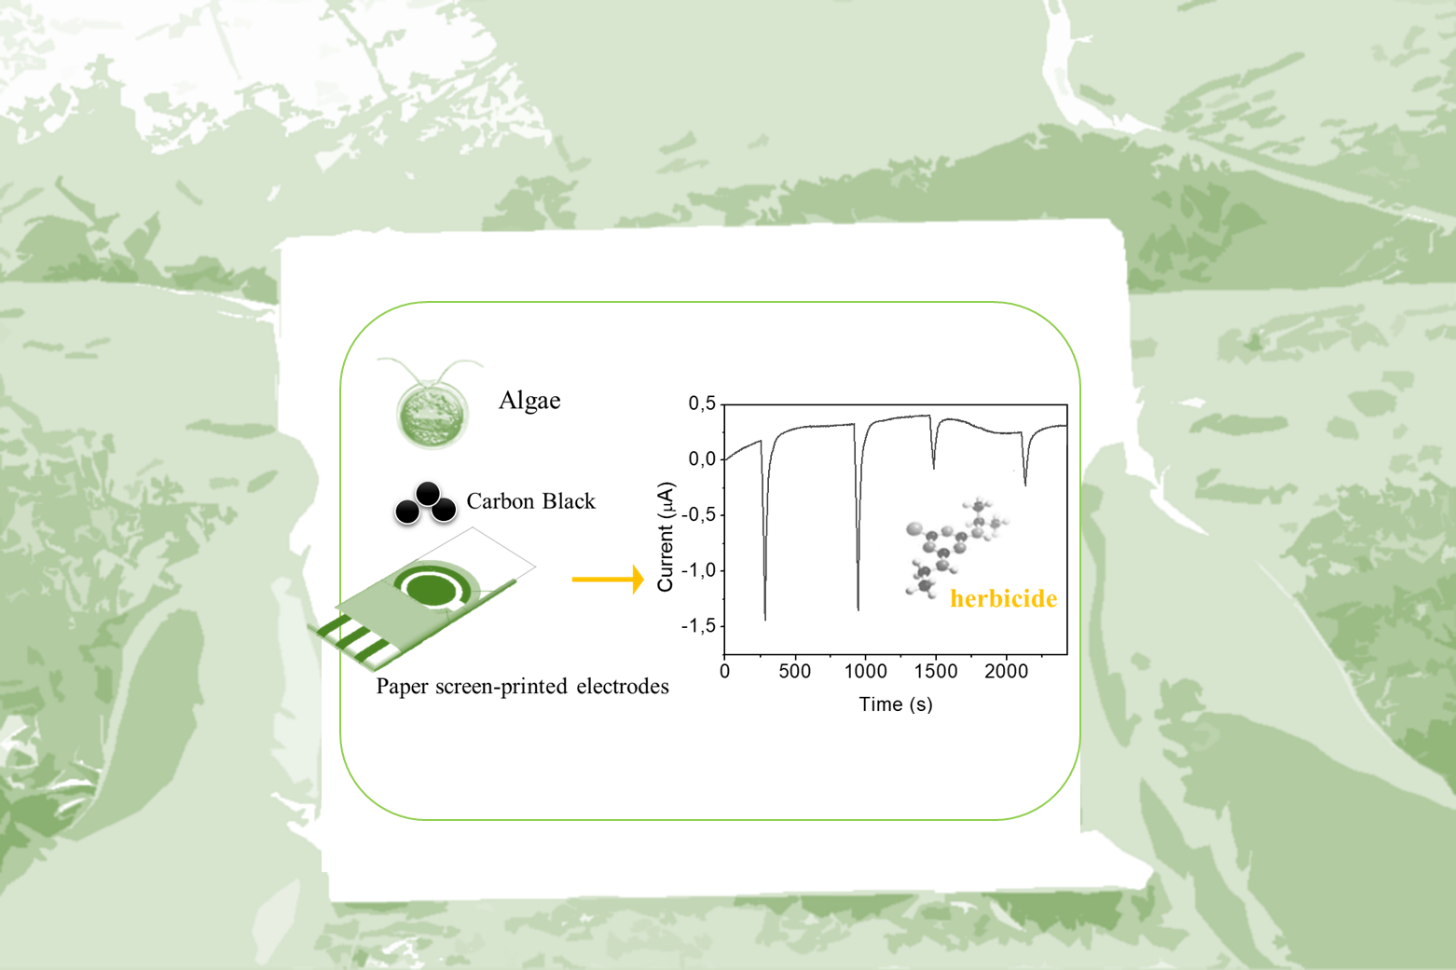


Graphical abstract

Supplement: Supplementary file 1 [file 6f07e5130834f79263fb1979.docx]
